# Supplementary material for: Structural basis for lamin assembly at the molecular level
Source: PubMed Central journal article supplement (PMC6704074; doi:10.1038/s41467-019-11684-x), 2019-08-21
Supplement: 41467_2019_11684_MOESM3_ESM.pdf [file 41467_2019_11684_MOESM3_ESM.pdf]

## Description of Additional Supplementary Files

**File name:** Supplementary Data 1

**Description:** Tandem mass spectrometry analysis of lamin 300, coil 2 (286-400) R388C, and their crosslinked proteins.
